# Supplementary material for: Competition between hydrogen bonding and arene–perfluoroarene stacking. X-Ray diffraction and molecular simulation on 5,6,7,8-tetrafluoro-2-naphthoic acid and 5,6,7,8-tetrafluoro-2-naphthamide crystals
Source: Royal Society of Chemistry journal article supplement (doi:10.1039/b820791g), 2009-01-01
Supplement: b820791g.pdf [file b820791g.pdf]

**Competition between hydrogen bonding and arene-perfluoroarene stacking. X-ray diffraction and molecular simulation on 5,6,7,8-tetrafluoro-2-naphthoic acid and 5,6,7,8-tetrafluoro-2-naphthamide crystals.†**

**Franco Cozzi, Sergio Bacchi, Giuseppe Filippini, Tullio Pilati, and Angelo Gavezzotti**

**SUPPLEMENTARY MATERIAL**

Table S1 Cell parameters as a function of temperature. Å and degree units.

tetrafluoronaphthoic acid,  $P2_1/c$   $Z=4$

| T, K | <i>a</i> | <i>b</i>  | <i>c</i>   | $\beta$  | <i>V</i>  |
|------|----------|-----------|------------|----------|-----------|
| 93   | 4.943(2) | 5.902(2)  | 30.706(12) | 90.88(2) | 895.7(6)  |
| 143  | 4.966(3) | 5.903(5)  | 30.80(2)   | 91.31(2) | 902.4(13) |
| 193  | 5.002(5) | 5.908(6)  | 30.94(3)   | 91.75(2) | 913.9(16) |
| 243  | 5.022(4) | 5.893(5)  | 30.98(3)   | 92.27(2) | 916.2(14) |
| 295  | 5.053(2) | 5.884(24) | 31.085(12) | 92.83(1) | 923.1(6)  |

tetrafluoronaphthamide,  $P1$ -,  $Z=2$

| T, K | <i>a</i>   | <i>b</i>   | <i>c</i>   | $\alpha$ | $\beta$  | $\gamma$  | <i>V</i>  |
|------|------------|------------|------------|----------|----------|-----------|-----------|
| 93   | 4.9386(14) | 7.250(2)   | 13.210(4)  | 97.63(1) | 96.44(1) | 100.47(1) | 456.5(2)  |
| 143  | 4.942(3)   | 7.278(5)   | 13.284(9)  | 97.41(2) | 96.66(2) | 100.60(2) | 460.9(12) |
| 193  | 4.946(4)   | 7.295(5)   | 13.345(9)  | 97.08(2) | 96.90(2) | 100.67(2) | 464.5(13) |
| 223  | 4.948(6)   | 7.3018(8)  | 13.384(15) | 96.90(2) | 97.05(2) | 100.71(2) | 466(2)    |
| 295  | 4.9553(10) | 7.3353(15) | 13.504(3)  | 96.42(1) | 97.36(1) | 100.81(1) | 473.5(3)  |

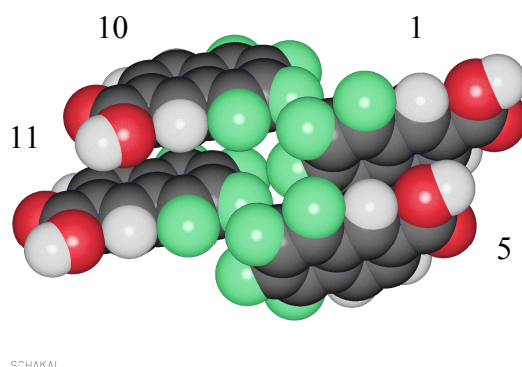

**Figure S1 .** Tetrafluoronaphthoic acid: the screw-supported molecular engagement at the fluorine segregation region. Shortest F...F distances are 3.4 and 3.7 Å. See the corresponding cohesion energy in Table 1.

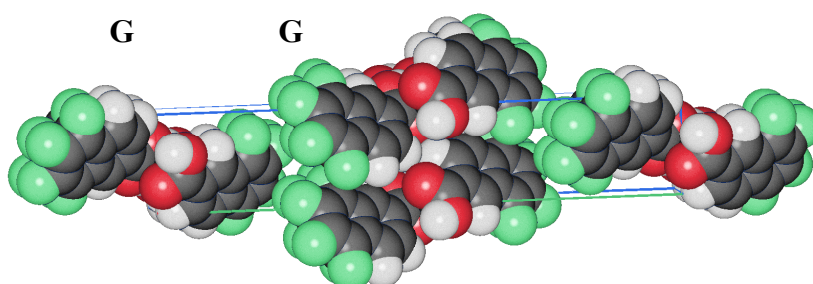

**Figure S2.** The overall crystal packing of tetrafluoronaphthoic acid. The *c* cell translation is horizontal. The fluorine segregation zones are visible at 1/4 and 3/4 of the cell length. Glide-related molecules (G...G) are second-neighbours too far away to interact significantly.

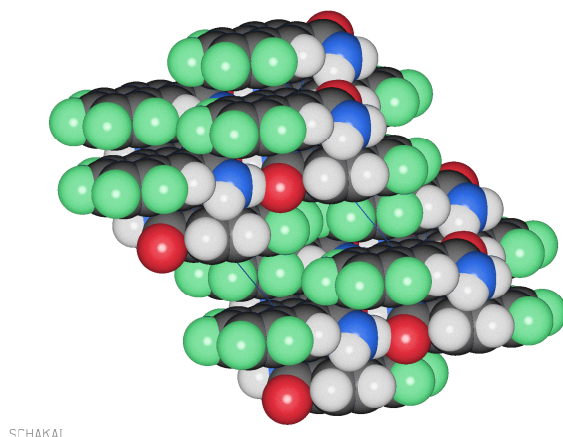

**Figure S3.** Overall packing view of the tetrafluoronaphthamide crystal. Cyclic H-bonds are in the layers, interlayer H-bonds are as in Figure 5.
